# Supplementary material for: An Overview on Fecal Profiles of Amino Acids and Related Amino-Derived Compounds in Children with Autism Spectrum Disorder in Tunisia
Source: Molecules. 2023 Apr 6;28(7):3269. doi: 10.3390/molecules28073269 (PMC10096484; doi:10.3390/molecules28073269)
Supplement: Supplementary file 1 [file molecules-28-03269-s001.zip › Table S2.pdf]

**Table S2. Correlations of variables used in the linear discriminant analysis to the discriminant functions at the age of 4-7 years,** based on levels of 19 amino acids determined in fecal samples of autistic children, their siblings and children from the general population.

| Metabolite    | F1    | F2     |
|---------------|-------|--------|
| Aspartate     | 0,475 | -0,067 |
| Glutamate     | 0,486 | 0,045  |
| Asparagine    | 0,161 | 0,259  |
| Serine        | 0,388 | -0,035 |
| Glutamine     | 0,599 | 0,100  |
| Histidine     | 0,307 | 0,143  |
| Glycine       | 0,536 | 0,056  |
| Threonine     | 0,436 | 0,085  |
| Arginine      | 0,365 | -0,123 |
| Alanine       | 0,669 | -0,094 |
| Tyrosine      | 0,662 | 0,046  |
| Valine        | 0,531 | 0,071  |
| Methionine    | 0,487 | 0,006  |
| Tryptophan    | 0,549 | 0,056  |
| Isoleucine    | 0,508 | 0,058  |
| Leucine       | 0,527 | 0,019  |
| Phenylalanine | 0,536 | -0,012 |
| Ornithine     | 0,419 | 0,034  |
| Lysine        | 0,517 | 0,011  |
