# Supplementary material for: An Overview on Fecal Profiles of Amino Acids and Related Amino-Derived Compounds in Children with Autism Spectrum Disorder in Tunisia
Source: Molecules. 2023 Apr 6;28(7):3269. doi: 10.3390/molecules28073269 (PMC10096484; doi:10.3390/molecules28073269)
Supplement: Supplementary file 1 [file molecules-28-03269-s001.zip › Table S3.pdf]

**Table S3. Correlations of variables used in the linear discriminant analysis to the discriminant functions at the age of 8-10 years,** based on levels of 19 amino acids determined in fecal samples of autistic children, their siblings and children from the general population.

| <b>Metabolite</b> | <b>F1</b> | <b>F2</b> |
|-------------------|-----------|-----------|
| Aspartate         | -0,283    | 0,177     |
| Glutamate         | -0,251    | 0,470     |
| Asparagine        | -0,287    | -0,017    |
| Serine            | -0,194    | 0,156     |
| Glutamine         | -0,413    | 0,133     |
| Histidine         | -0,311    | 0,332     |
| Glycine           | -0,448    | 0,295     |
| Threonine         | -0,268    | 0,207     |
| Arginine          | -0,113    | -0,042    |
| Alanine           | -0,624    | 0,223     |
| Tyrosine          | -0,346    | 0,256     |
| Valine            | -0,412    | 0,254     |
| Methionine        | -0,385    | 0,227     |
| Tryptophan        | -0,377    | 0,206     |
| Isoleucine        | -0,385    | 0,231     |
| Leucine           | -0,393    | 0,218     |
| Phenylalanine     | -0,371    | 0,263     |
| Ornithine         | -0,218    | 0,239     |
| Lysine            | -0,388    | 0,199     |
